# Supplementary material
Source: HighWire-hosted journal article supplement (https://erj.ersjournals.com/content/56/6/1902208)
Supplement: inline-supplementary-material-1 [file inline-supplementary-material-1.pdf]

## **“Online Data Supplement”**

### **Vitamin C to Pregnant Smokers Persistently Improves Infant Airway Function to 12 Months of Age: A Randomized Trial**

Cindy T. McEvoy, MD, MCR, Lyndsey E. Shorey-Kendrick, PhD, Kristin Milner BA, Diane Schilling, RRT, Christina Tiller, RRT, Brittany Vuylsteke, MPH, Ashley Scherman RN, PhD, Keith Jackson, RRT, David M. Haas MD, MS, Julia Harris,BS, Byung S.Park, PhD, Annette Vu, MPH, Dale F. Kraemer, PhD, David Gonzales, PhD, Carol Bunten, MD, Eliot R. Spindel, MD, PhD, Cynthia D. Morris, PhD, MPH, Robert S. Tepper, MD, PhD

**Supplement Table S1A.** Reasons for Missing Data of Delivered Patients

**Supplement Table S1B.** Details of Missingness of Delivered Patients

**Supplement Table S2.** Demographics of Patients at 3 and 12 Month Airway Function Testing

**Supplement Table S3A.** Mixed-model, Repeated Measures Analysis of Covariance

Results for Airway Function Test Parameters

**Supplement Table S3B.** Sample Sizes for Airway Function Test Analyses

**Supplemental Table S4.** Infant Airway Function Tests at 12 Months of Age

# **Supplement Table S1A** **Reasons for Missing Data of Delivered Patients**

Population: Delivered (n=241)<sup>a</sup>

|                                                  | 3 month test |         | 12 month test |         |
|--------------------------------------------------|--------------|---------|---------------|---------|
|                                                  | Vitamin      |         | Vitamin       |         |
|                                                  | C            | Placebo | C             | Placebo |
| Withdrew consent                                 | 1            | 3       | 4             | 3       |
| Airway Function Test not performed               | 4            | 7       | 8             | 13      |
| Technically Unacceptable Airway Function Test    | 1            | 2       | 5             | 5       |
| Airway Function Test performed outside of window | 0            | 1       | 1             | 0       |

<sup>a</sup> Delivered 243, excluding 2 infant deaths prior to the 3 month airway function test=241

AFT= Airway Function Test

**Supplement Table S1B**  
**Details of Missingness of Delivered Patients**

Population: Delivered (n=241)<sup>a</sup>

|                                           | 3 Month Airway Function Test |                    |                  |                    | 12 Month Airway Function Test |                    |                   |                    |
|-------------------------------------------|------------------------------|--------------------|------------------|--------------------|-------------------------------|--------------------|-------------------|--------------------|
|                                           | Placebo                      |                    | Vitamin C        |                    | Placebo                       |                    | Vitamin C         |                    |
|                                           | Missing<br>(n=13)            | Present<br>(n=109) | Missing<br>(n=6) | Present<br>(n=113) | Missing<br>(n=21)             | Present<br>(n=101) | Missing<br>(n=18) | Present<br>(n=101) |
| <b>Race, n (%)</b>                        |                              |                    |                  |                    |                               |                    |                   |                    |
| White                                     | 12 (92.3)                    | 86 (78.9)          | 5 (83.3)         | 88 (77.9)          | 17 (80.9)                     | 81 (80.2)          | 11 (61.1)         | 82 (81.2)          |
| Non-white                                 | 1 (7.7)                      | 23 (21.1)          | 1 (16.7)         | 25 (22.1)          | 4 (19.1)                      | 20 (19.8)          | 7 (38.9)          | 19 (18.8)          |
| <b>Ethnicity, n (%)</b>                   |                              |                    |                  |                    |                               |                    |                   |                    |
| Hispanic or Latino                        | 0 (0)                        | 7 (6.4)            | 0 (0)            | 2 (1.8)            | 0 (0)                         | 7 (6.9)            | 1 (5.6)           | 1 (0.9)            |
| Non-Hispanic or Latino                    | 13 (100)                     | 102 (93.6)         | 6                | 110 (97.3)         | 21 (100)                      | 94 (93.1)          | 17 (94.4)         | 99 (98.0)          |
| Unknown or not reported                   | 0 (0)                        | 0 (0)              | 0 (0)            | 1 (0.9)            | 0 (0)                         | 0 (0)              | 0 (0)             | 1 (0.9)            |
| <b>Maternal age at enrollment (years)</b> |                              |                    |                  |                    |                               |                    |                   |                    |
| n                                         | 13                           | 109                | 6                | 113                | 21                            | 101                | 18                | 101                |
| Mean(SD)                                  | 24.1 (5.3)                   | 26.6 (5.9)         | 28.5 (5.3)       | 26.5 (5.2)         | 25.3 (6.4)                    | 26.6 (5.8)         | 26.9 (4.5)        | 26.5 (5.4)         |
| Median                                    | 22                           | 26                 | 31               | 26                 | 24                            | 26                 | 27.5              | 26                 |
| Min, Max                                  | 18, 33                       | 17, 42             | 20, 33           | 17, 38             | 17, 41                        | 17, 42             | 19, 33            | 17, 38             |
| <b>GA at randomization (weeks)</b>        |                              |                    |                  |                    |                               |                    |                   |                    |
| n                                         | 13                           | 109                | 6                | 113                | 21                            | 101                | 18                | 101                |
| Mean(SD)                                  | 18.6 (2.6)                   | 18.2 (2.8)         | 17.0 (3.2)       | 18.6 (3.0)         | 18.5 (2.5)                    | 18.3 (2.8)         | 18.7 (2.9)        | 18.4 (3.0)         |
| Median                                    | 18.7                         | 18.3               | 15.6             | 19.3               | 18.6                          | 18.1               | 20.3              | 19.3               |
| Min, Max                                  | 14.7, 22.6                   | 12.9, 22.9         | 13.7, 21.3       | 13.0, 22.9         | 17, 41                        | 12.9, 22.9         | 13.9, 22.4        | 13.0, 22.9         |
| <b>GA at birth (weeks)</b>                |                              |                    |                  |                    |                               |                    |                   |                    |
| n                                         | 13                           | 109                | 6                | 113                | 21                            | 101                | 18                | 101                |
| Mean(SD)                                  | 38.5 (1.2)                   | 38.6 (1.9)         | 39.0 (0.7)       | 38.7 (1.9)         | 38.5 (1.1)                    | 38.6 (1.8)         | 38.1 (2.3)        | 38.8 (1.7)         |
| Median                                    | 39                           | 39                 | 39               | 39                 | 38.6                          | 39                 | 38.8              | 39                 |
| Min, Max                                  | 35.7, 39.7                   | 31.3, 41.3         | 37.7, 39.6       | 30.6, 42.4         | 35.7, 40.1                    | 31.3, 41.3         | 30.6, 40.7        | 30.6, 42.4         |
| <b>Infant birthweight (grams)</b>         |                              |                    |                  |                    |                               |                    |                   |                    |
| n                                         | 11                           | 108                | 6                | 113                | 19                            | 100                | 18                | 101                |
| Mean(SD)                                  | 3182<br>(550)                | 3063<br>(554)      | 3312<br>(283)    | 3118<br>(524)      | 3200<br>(590)                 | 3050<br>(545)      | 2932<br>(536)     | 3162<br>(506)      |
| Median                                    | 3266                         | 3135               | 3285             | 3070               | 3266                          | 3135               | 3005              | 3170               |

|                                             |               |               |               |               |               |               |               |               |
|---------------------------------------------|---------------|---------------|---------------|---------------|---------------|---------------|---------------|---------------|
| Min, Max                                    | 2241,<br>3920 | 1280,<br>4125 | 2860,<br>3620 | 1540,<br>4295 | 2241,<br>4125 | 1280,<br>3990 | 1540,<br>3620 | 1580,<br>4295 |
| <b>Center, n (%)</b>                        |               |               |               |               |               |               |               |               |
| IU                                          | 10 (77)       | 37 (33.9)     | 5 (83.3)      | 40 (35.4)     | 10 (47.6)     | 37 (36.6)     | 10 (55.6)     | 35 (34.6)     |
| OHSU                                        | 0 (0)         | 20 (18.3)     | 0 (0)         | 20 (17.7)     | 2 (9.5)       | 18 (17.8)     | 1 (5.6)       | 19 (18.8)     |
| SWW                                         | 3 (23)        | 52 (47.7)     | 1 (16.7)      | 53 (46.9)     | 9 (42.9)      | 46 (45.5)     | 7 (38.9)      | 47 (46.5)     |
| <b>Health Insurance Type, n (%)</b>         |               |               |               |               |               |               |               |               |
| Government Assistance                       | 13 (100)      | 89 (81.6)     | 6 (100)       | 100 (88.5)    | 19 (90.5)     | 83 (82.2)     | 16 (88.9)     | 90 (89.1)     |
| Private Insurance                           | 0 (0)         | 18 (16.5)     | 0 (0)         | 13 (11.5)     | 2 (9.5)       | 16 (15.8)     | 2 (11.1)      | 11 (10.9)     |
| None of Self Pay                            | 0 (0)         | 2 (1.83)      | 0 (0)         | 0 (0)         | 0 (0)         | 2 (2)         | 0 (0)         | 0 (0)         |
| <b>Highest Education Level, n (%)</b>       |               |               |               |               |               |               |               |               |
| Less than high school                       | 4 (30.8)      | 27 (24.8)     | 1 (16.7)      | 19 (16.8)     | 5 (23.8)      | 26 (25.7)     | 2 (11.1)      | 18 (17.8)     |
| High School or GED                          | 5 (38.5)      | 32 (29.4)     | 1 (16.7)      | 53 (46.9)     | 7 (33.3)      | 30 (29.7)     | 7 (38.9)      | 47 (46.5)     |
| Some College                                | 4 (30.8)      | 44 (40.4)     | 4 (66.7)      | 38 (33.6)     | 8 (38.1)      | 40 (39.6)     | 9 (50)        | 33 (32.7)     |
| Bachelor's Degree                           | 0 (0)         | 6 (5.5)       | 0 (0)         | 3 (2.6)       | 1 (4.7)       | 5 (5.0)       | 0 (0)         | 3 (3.0)       |
| <b>Maternal asthma, n (%)</b>               |               |               |               |               |               |               |               |               |
| Yes                                         | 3 (23.1)      | 35 (32.1)     | 3 (50)        | 37 (32.7)     | 7 (33.3)      | 31 (30.7)     | 4 (22.2)      | 36 (35.6)     |
| No                                          | 10 (76.9)     | 74 (67.9)     | 3 (50)        | 76 (67.2)     | 14 (66.7)     | 70 (69.3)     | 14 (77.8)     | 65 (64.4)     |
| <b>Average # cigarettes/day at delivery</b> |               |               |               |               |               |               |               |               |
| N                                           | 13            | 109           | 6             | 113           | 21            | 101           | 18            | 101           |
| Mean(SD)                                    | 4.7 (4.6)     | 6.0 (5.8)     | 5.2 (3.3)     | 6.8 (5.4)     | 6.0 (5.7)     | 5.9 (5.7)     | 7.2 (7.0)     | 6.6 (5.0)     |
| Median                                      | 5             | 5             | 4.5           | 6             | 5             | 5             | 5.5           | 6             |
| Min, Max                                    | 0, 13         | 0, 20         | 2, 10         | 0, 20         | 0, 20         | 0, 20         | 0, 20         | 0, 20         |

<sup>a</sup> Delivered 243, excluding 2 infant deaths prior to the 3 month airway function test=241

**Supplement Table S2. Demographics of Patients at 3 and 12 Month Airway Function Testing**

|                           | Vitamin C treated<br>at 3 month test<br>(n=113) | Vitamin C treated at<br>12 month test<br>(n=101) | Placebo treated at 3<br>month test<br>(n=109) | Placebo treated at<br>12 month test<br>(n=101) |
|---------------------------|-------------------------------------------------|--------------------------------------------------|-----------------------------------------------|------------------------------------------------|
| Length (cm), mean (SD)    | 60.2 (3.2)                                      | 74.4 (3.2)                                       | 60.2 (2.9)                                    | 73.9 (3.3)                                     |
| Length z-score, mean (SD) | -0.897 (0.913)                                  | -0.307 (0.883)                                   | -0.917 (0.972)                                | -0.389 (1.007)                                 |
| Weight (kg), mean (SD)    | 6.39 (0.96)                                     | 10.06 (1.23)                                     | 6.27 (0.96)                                   | 9.66 (1.26)                                    |
| Weight z-score, mean (SD) | 0.28 (0.96)                                     | 0.05 (1.00)                                      | 0.10 (1.17)                                   | -0.28 (1.19)                                   |
| Female infants, n (%)     | 54 (48%)                                        | 49 (49%)                                         | 54 (50%)                                      | 50 (50%)                                       |
| White infants, n (%)      | 88 (79%)                                        | 82 (81%)                                         | 86 (79%)                                      | 81 (80%)                                       |

**Supplement Table S3A**  
**Mixed-model, Repeated Measures Analysis of Covariance Results for Airway Function Test Parameters**

Population: Delivered (n=241)<sup>a</sup>

| AFT<br>Parameter     | Treatment Group Effect  |                       |                       | Visit Effect          |                        |                          | ANCOVA Model p-values        |                 |                                      |
|----------------------|-------------------------|-----------------------|-----------------------|-----------------------|------------------------|--------------------------|------------------------------|-----------------|--------------------------------------|
|                      | Vitamin C<br>Group Mean | Placebo<br>Group Mean | Mean<br>Difference    | 3-Month Visit<br>Mean | 12-Month<br>Visit Mean | Mean<br>Difference       | Treatment<br>Group<br>Effect | Visit<br>Effect | Treatment<br>by Visit<br>Interaction |
| FEF <sub>75</sub>    | 290.4 (260.6, 320.3)    | 250.2 (234.1, 266.4)  | 40.2 (6.6, 73.8)      | 198.2 (178.9, 217.6)  | 342.4 (322.2, 362.7)   | -144.2 ( -163.9, -124.5) | 0.0248                       | <0.0001         | 0.0565                               |
| FEF <sub>50</sub>    | 562.3 (520.1, 604.5)    | 504.0 (481.1, 526.9)  | 58.3 (10.9, 105.8)    | 423.4 (395.0, 451.7)  | 642.9 (612.9, 672.9)   | -219.6 (-251.8, -187.3)  | 0.0081                       | <0.0001         | 0.168                                |
| FEF <sub>25-75</sub> | 531.1 (472.7, 553.5)    | 458.0 (436.1, 479.9)  | 55.1 (9.6, 100.5)     | 377.2 (350.3, 404.1)  | 593.9 (565.6, 622.2)   | -216.7 (-246.5, -187.0)  | 0.0130                       | <0.0001         | 0.1195                               |
| FEV                  | 256.0 (242.3, 269.6)    | 239.6 (232.4, 246.9)  | 16.3 (1.0, 31.6)      | 182.5 (173.6, 191.4)  | 313.1 (303.8, 322.4)   | -130.5 (-140.0, -121.1)  | 0.0174                       | <0.0001         | 0.2685                               |
| FVC                  | 315.1 (296.3, 334.0)    | 302.2 (292.0, 312.4)  | 13.0 (-8.2, 34.2)     | 220.8 (208.1, 233.4)  | 396.6 (383.2, 409.9)   | -175.8 (-190.1, -161.4)  | 0.1350                       | <0.0001         | 0.7967                               |
| FEV<br>0.5/FVC       | .8295 (.8018, .8572)    | .8054 (.7906, .8202)  | 0.024 (-0.007, 0.055) | .8365 (.8183, .8547)  | .7984 (.7793, 8174)    | 0.038 (0.019, 0.058)     | 0.1198                       | 0.0029          | 0.3776                               |

<sup>a</sup> Delivered 243, excluding 2 infant deaths prior to the 3 month airway function test=241

AFT= Airway Function Test

**Supplement Table S3B**  
**Sample Sizes for Airway Function Test Analyses**

Population: Delivered (n=241)<sup>a</sup>

| Variable             | Months 3 and 12 | Month 3 only | Month 12 only | Total |
|----------------------|-----------------|--------------|---------------|-------|
| FEF <sub>75</sub>    | 198             | 24           | 4             | 226   |
| FEF <sub>50</sub>    | 198             | 24           | 4             | 226   |
| FEF <sub>25-75</sub> | 198             | 24           | 4             | 226   |
| FEV                  | 198             | 23           | 4             | 225   |
| FVC                  | 198             | 24           | 4             | 226   |
| FEV 0.5/FVC          | 198             | 23           | 4             | 225   |

<sup>a</sup> Delivered 243, excluding 2 infant deaths prior to the 3 month airway function test=241

Supplemental Table S4  
Infant Airway Function Tests at 12 Months of Age

|                               | Infants of Vitamin C<br>Treated Smokers<br>n=101 | Infant of Placebo Treated<br>Smokers<br>n=101 | P-Value <sup>1</sup> | Infants of Vitamin C<br>Treated Smokers<br>n=101 | Infant of Placebo<br>Treated Smokers<br>n=101 | P-Value <sup>2</sup> |
|-------------------------------|--------------------------------------------------|-----------------------------------------------|----------------------|--------------------------------------------------|-----------------------------------------------|----------------------|
| FEF <sub>75</sub> (mL/sec)    | 352 ± 7                                          | 324 ± 8                                       | 0.013                | 350 ± 10                                         | 323 ± 10                                      | 0.026                |
| FEF <sub>50</sub> (mL/sec)    | 654 ± 13                                         | 616 ± 12                                      | 0.031                | 657 ± 16                                         | 620 ± 15                                      | 0.051                |
| FEF <sub>25-75</sub> (mL/sec) | 609 ± 11                                         | 567± 12                                       | 0.011                | 612 ± 14                                         | 570 ± 14                                      | 0.011                |
| FEV <sub>0.5</sub> (mL)       | 317 ± 5                                          | 308± 4                                        | 0.13                 | 316 ± 5                                          | 310± 5                                        | 0.29                 |
| FVC (mL)                      | 397 ±7                                           | 394± 7                                        | 0.76                 | 395 ±7                                           | 398 ± 7                                       | 0.70                 |
| FEV <sub>0.5</sub> /FVC       | 0.806 ± 0.007                                    | 0.787 ± 0.007                                 | 0.055                | 0.808 ± 0.009                                    | 0.784 ± 0.009                                 | 0.032                |

Values are Mean ± SEM;

1. The unadjusted analysis compares groups using a two-independent t-test of means.

2. The adjusted analysis compare groups using an analysis of covariance model that includes design factors (site stratum, gestational age at randomization, and treatment group (and all interactions of these) and infant gender, white/non-white, and PFT length (without higher order interactions).
