# Supplementary material
Source: HighWire-hosted journal article supplement (https://erj.ersjournals.com/content/56/6/1902208)
Supplement: inline-supplementary-material-2 [file inline-supplementary-material-2.pdf]

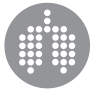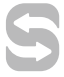

SHAREABLE PDF

# Vitamin C to pregnant smokers persistently improves infant airway function to 12 months of age: a randomised trial

Cindy T. McEvoy<sup>1</sup>, Lyndsey E. Shorey-Kendrick<sup>2</sup>, Kristin Milner<sup>1</sup>, Diane Schilling<sup>1</sup>, Christina Tiller<sup>3</sup>, Brittany Vuylsteke<sup>1</sup>, Ashley Scherman<sup>1</sup>, Keith Jackson<sup>4</sup>, David M. Haas<sup>5</sup>, Julia Harris<sup>1</sup>, Byung S. Park<sup>6</sup>, Annette Vu<sup>7</sup>, Dale F. Kraemer<sup>7</sup>, David Gonzales<sup>8</sup>, Carol Bunten<sup>9</sup>, Eliot R. Spindel<sup>2</sup>, Cynthia D. Morris<sup>7,10</sup> and Robert S. Tepper<sup>3</sup>

**Affiliations:** <sup>1</sup>Dept of Pediatrics, Oregon Health and Science University, Portland, OR, USA. <sup>2</sup>Division of Neuroscience, Oregon National Primate Research Center, Beaverton, OR, USA. <sup>3</sup>Dept of Pediatrics, Indiana University School of Medicine, Indianapolis, IN, USA. <sup>4</sup>PeaceHealth Southwest Medical Center, Vancouver, WA, USA. <sup>5</sup>Dept of Obstetrics and Gynecology, Indiana University School of Medicine, Indianapolis, IN, USA. <sup>6</sup>Oregon Health and Science University–Portland State University, School of Public Health and Knight Cancer Institute, Portland, OR, USA. <sup>7</sup>Dept of Medical Informatics and Clinical Epidemiology, Oregon Health and Science University, Portland, OR, USA. <sup>8</sup>Division of Pulmonary and Critical Care Medicine, Oregon Health and Science University, Portland, OR, USA. <sup>9</sup>Vancouver Clinic, Vancouver, WA, USA. <sup>10</sup>Oregon Clinical and Translational Research Institute, Oregon Health and Science University, Portland, OR, USA.

**Correspondence:** Cindy T. McEvoy, Oregon Health and Science University, Dept of Pediatrics, 707 SW Gaines Street, CDRC-P, Portland, OR, 97239, USA. E-mail: mcevoyc@ohsu.edu

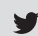

@ERSpublications

Vitamin C supplementation coupled with smoking cessation counselling for pregnant smokers may be a safe, inexpensive, and simple intervention to improve the airway function of their offspring through 12 months of age <https://bit.ly/3fa8q2X>

**Cite this article as:** McEvoy CT, Shorey-Kendrick LE, Milner K, *et al.* Vitamin C to pregnant smokers persistently improves infant airway function to 12 months of age: a randomised trial. *Eur Respir J* 2020; 56: 1902208 [<https://doi.org/10.1183/13993003.02208-2019>].

This single-page version can be shared freely online.

## ABSTRACT

**Background:** Vitamin C (500 mg·day<sup>-1</sup>) supplementation for pregnant smokers has been reported to increase newborn pulmonary function and infant forced expiratory flows (FEFs) at 3 months of age. Its effect on airway function through 12 months of age has not been reported.

**Objective:** To assess whether vitamin C supplementation to pregnant smokers is associated with a sustained increased airway function in their infants through 12 months of age.

**Methods:** This is a pre-specified secondary outcome of a randomised, double-blind, placebo-controlled trial that randomised 251 pregnant smokers between 13 and 23 weeks of gestation: 125 to 500 mg·day<sup>-1</sup> vitamin C and 126 to placebo. Smoking cessation counselling was provided. FEFs performed at 3 and 12 months of age were analysed by repeated-measures analysis of covariance.

**Results:** FEFs were performed in 222 infants at 3 months and 202 infants at 12 months of age. The infants allocated to vitamin C had significantly increased FEFs over the first year of life compared to those allocated to placebo. The overall increased flows were 40.2 mL·s<sup>-1</sup> for at FEF<sub>75</sub> (75% of forced vital capacity (FVC)) (adjusted 95% CI for difference 6.6–73.8; p=0.025); 58.3 mL·s<sup>-1</sup> for FEF<sub>50</sub> (10.9–105.8; p=0.0081); and 55.1 mL·s<sup>-1</sup> for FEF<sub>25–75</sub> (9.7–100.5; p=0.013).

**Conclusions:** In offspring of pregnant smokers randomised to vitamin C *versus* placebo, vitamin C during pregnancy was associated with a small but significantly increased airway function at 3 and 12 months of age, suggesting a potential shift to a higher airway function trajectory curve. Continued follow-up is underway.
